# Supplementary material for: Nuclear Localization of BRAFV600E Is Associated with HMOX-1 Upregulation and Aggressive Behavior of Melanoma Cells
Source: MDPI journal article supplement (doi:10.3390/cancers14020311), 2022-01-09

MEF Cells

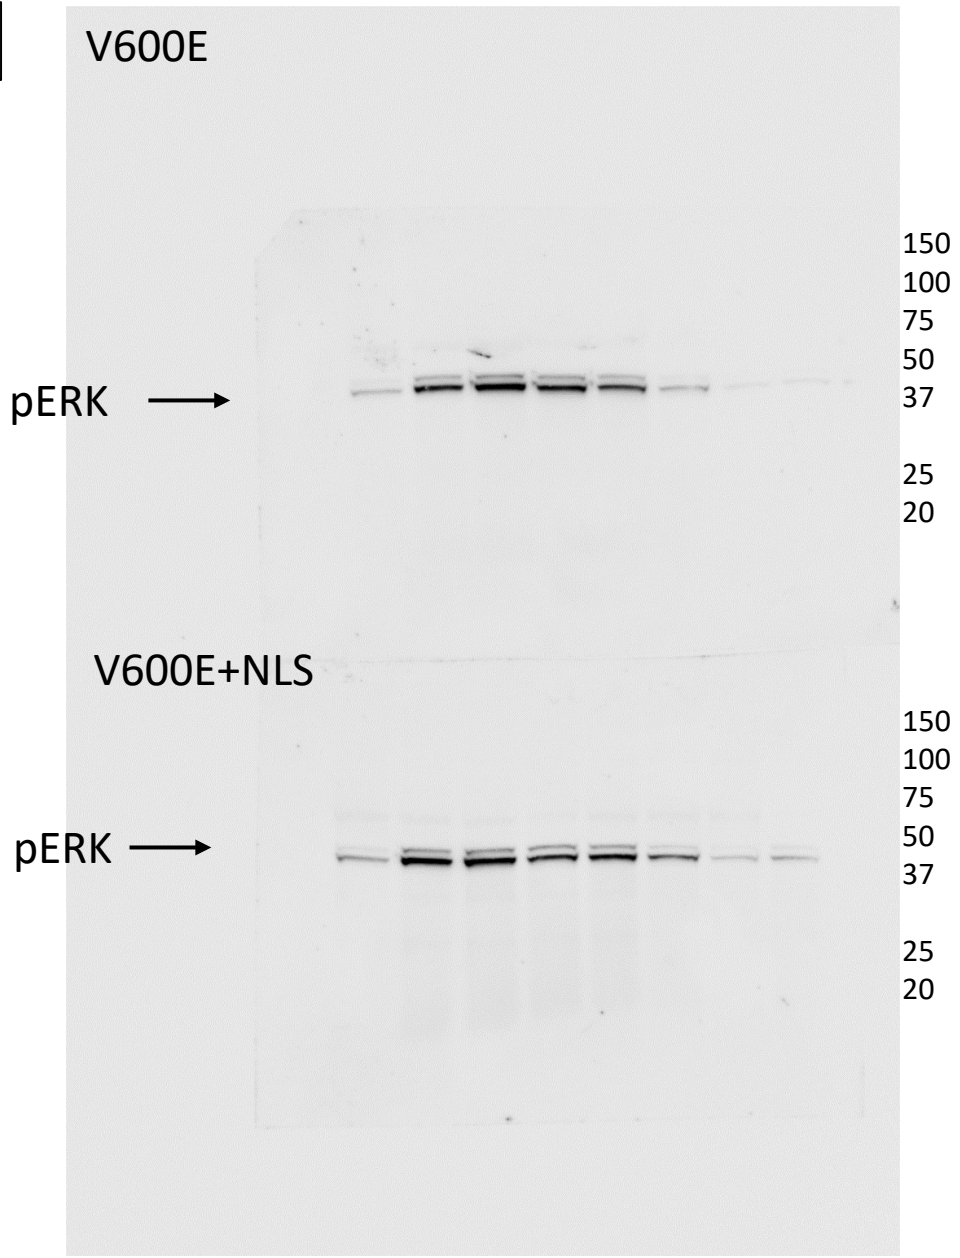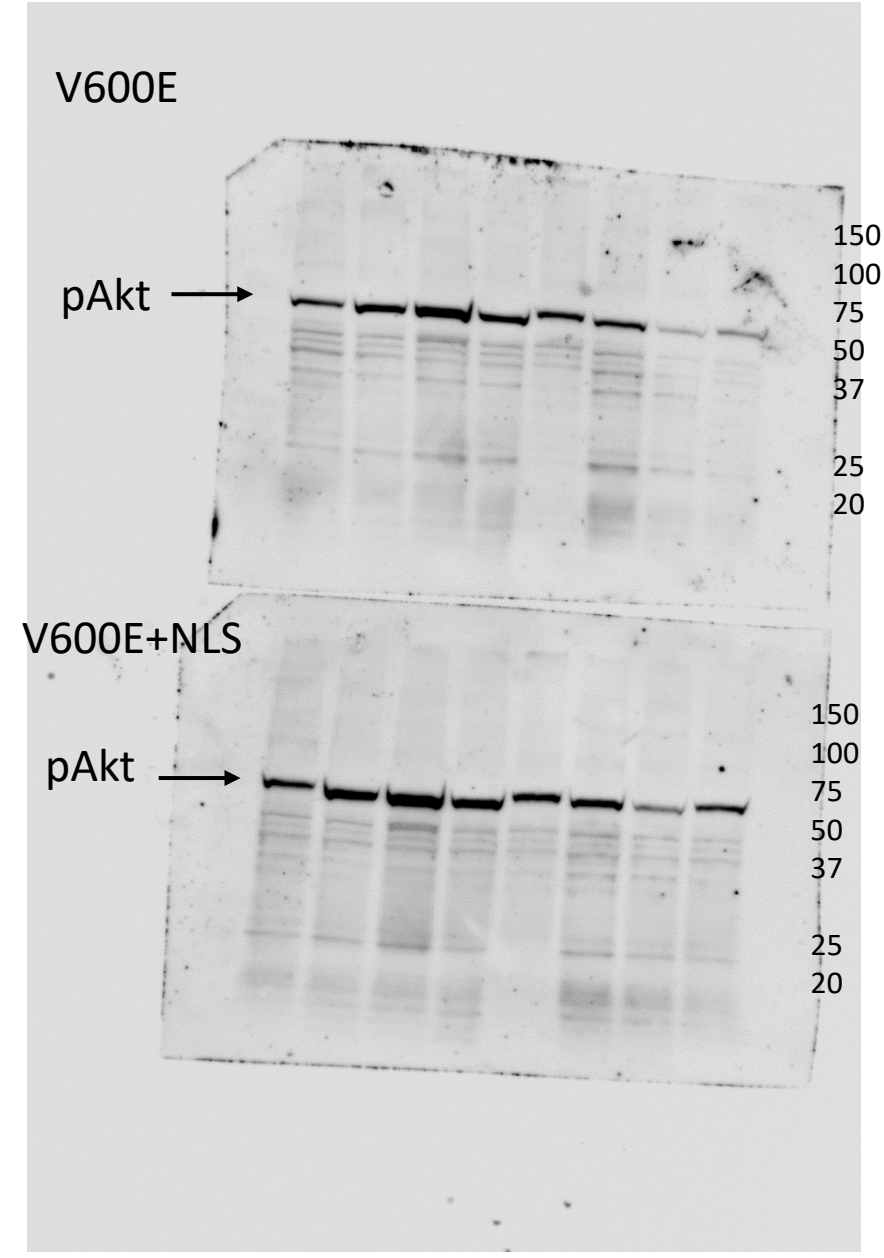

MEF Cells

Original blots for Fig. 3D

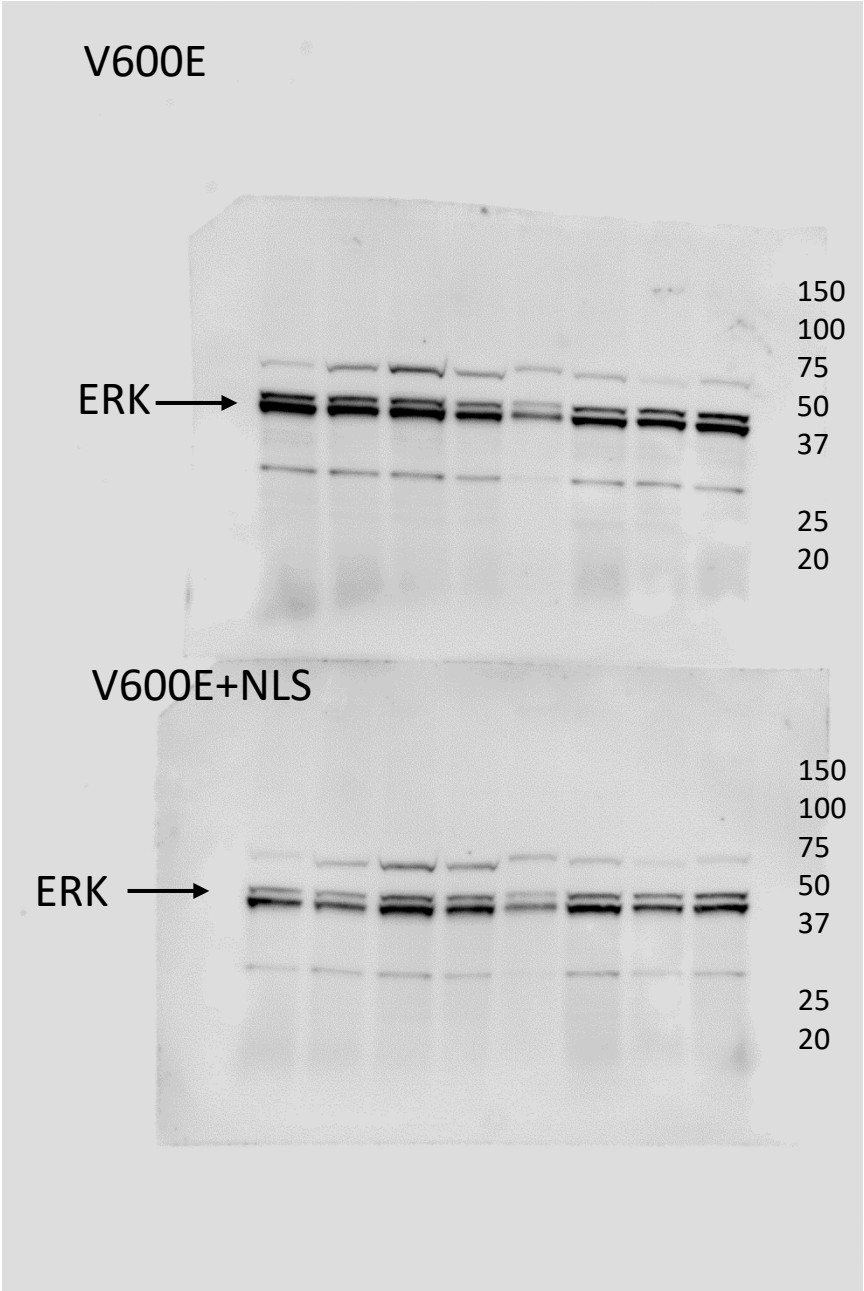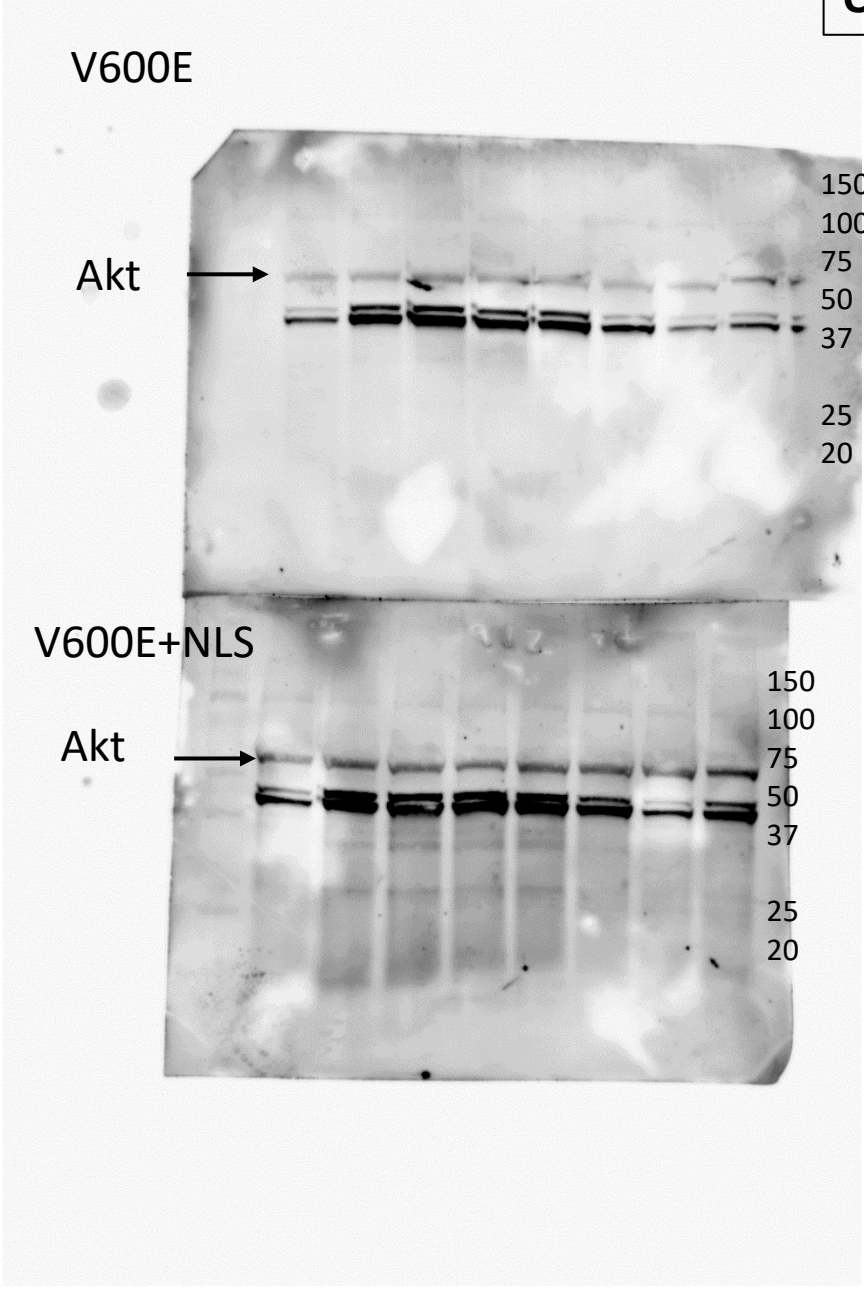

MEF Cells

Original blots for Fig. 3D

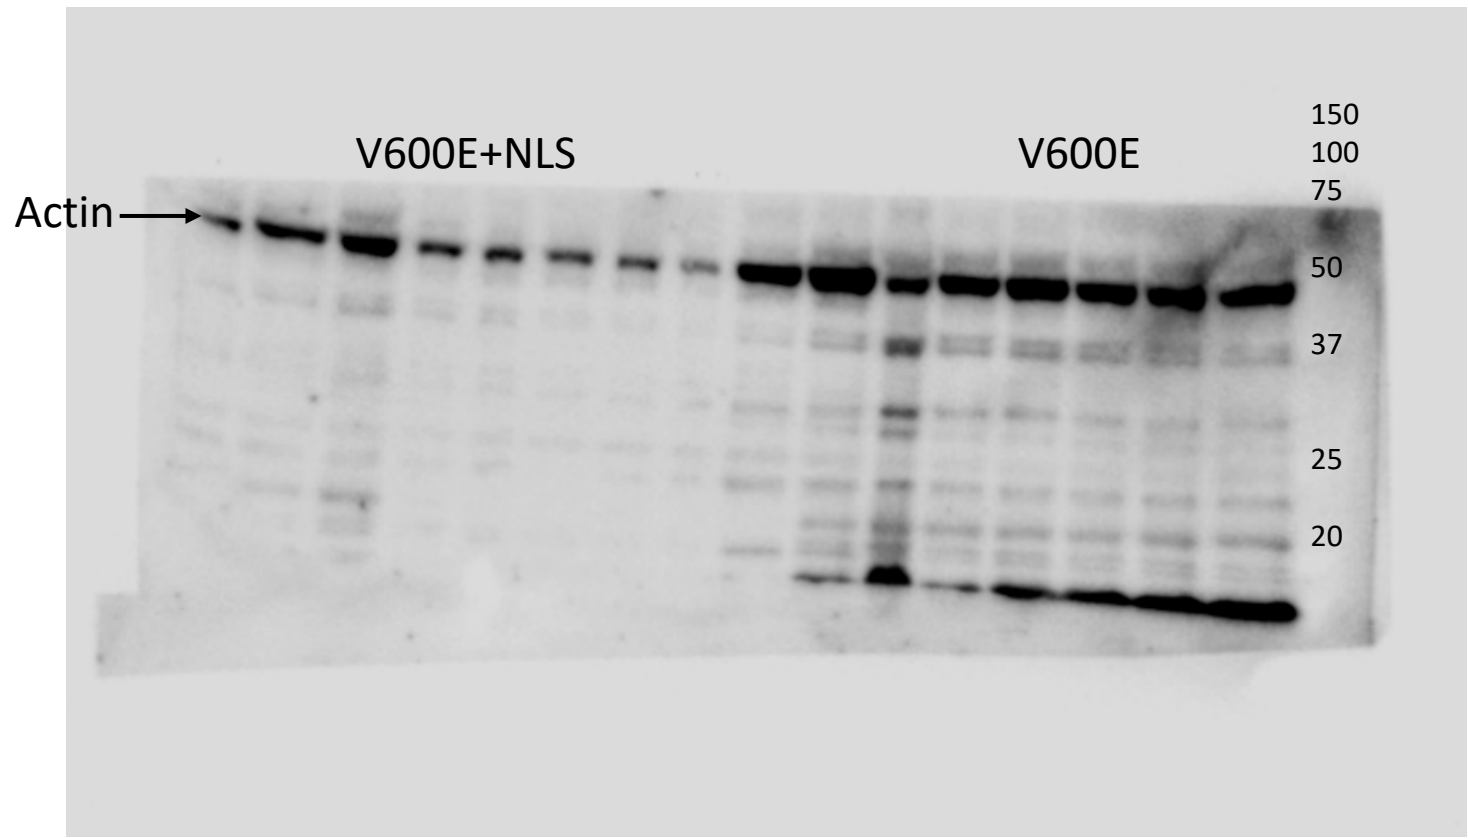

A375R Cells

## GAPDH in A375R cells

Original blots for Fig. 1D and 4A

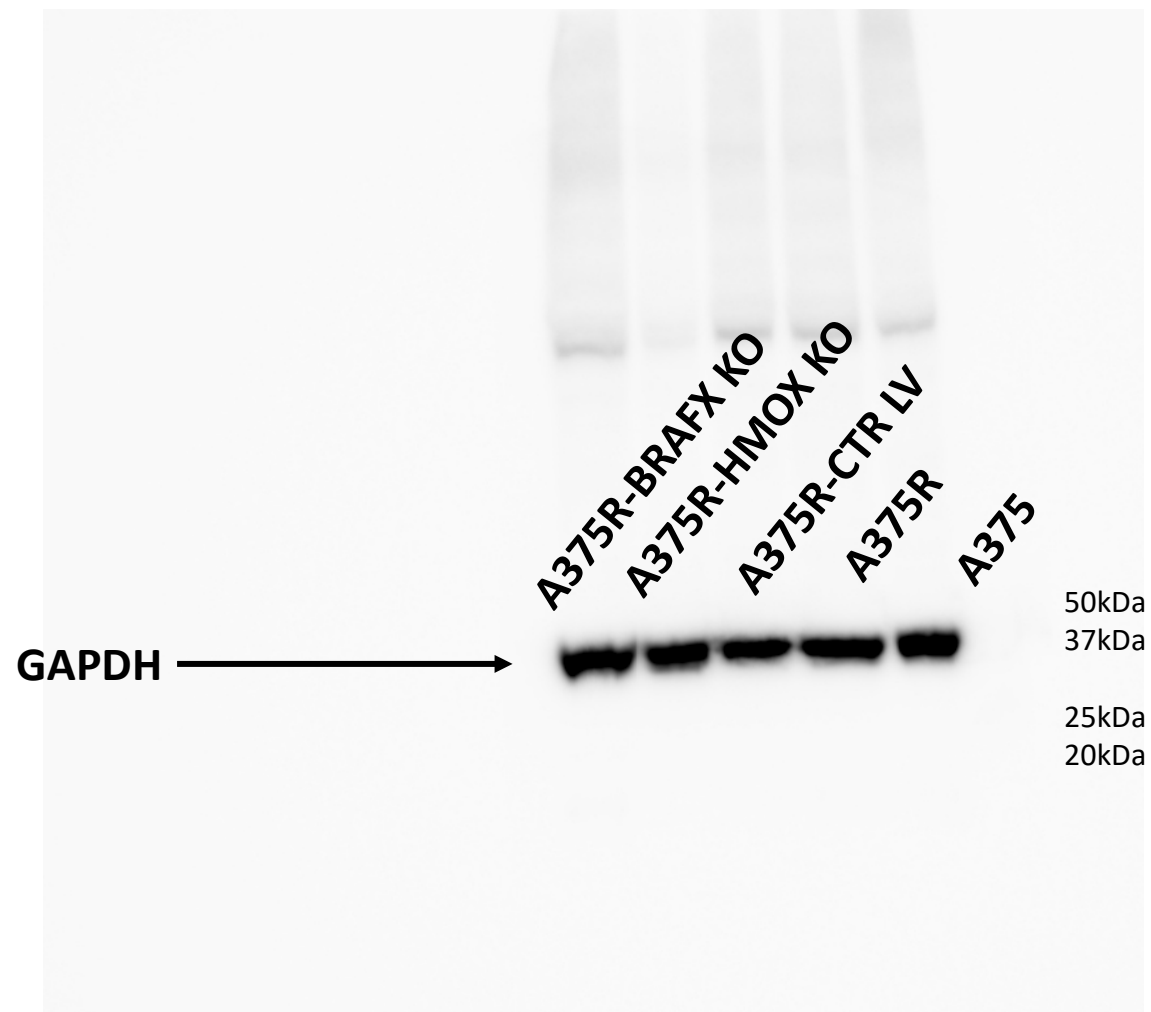

A375R Cells

Original blots for Fig. 1D and 4A

# HMOX-1 KO in A375R cells

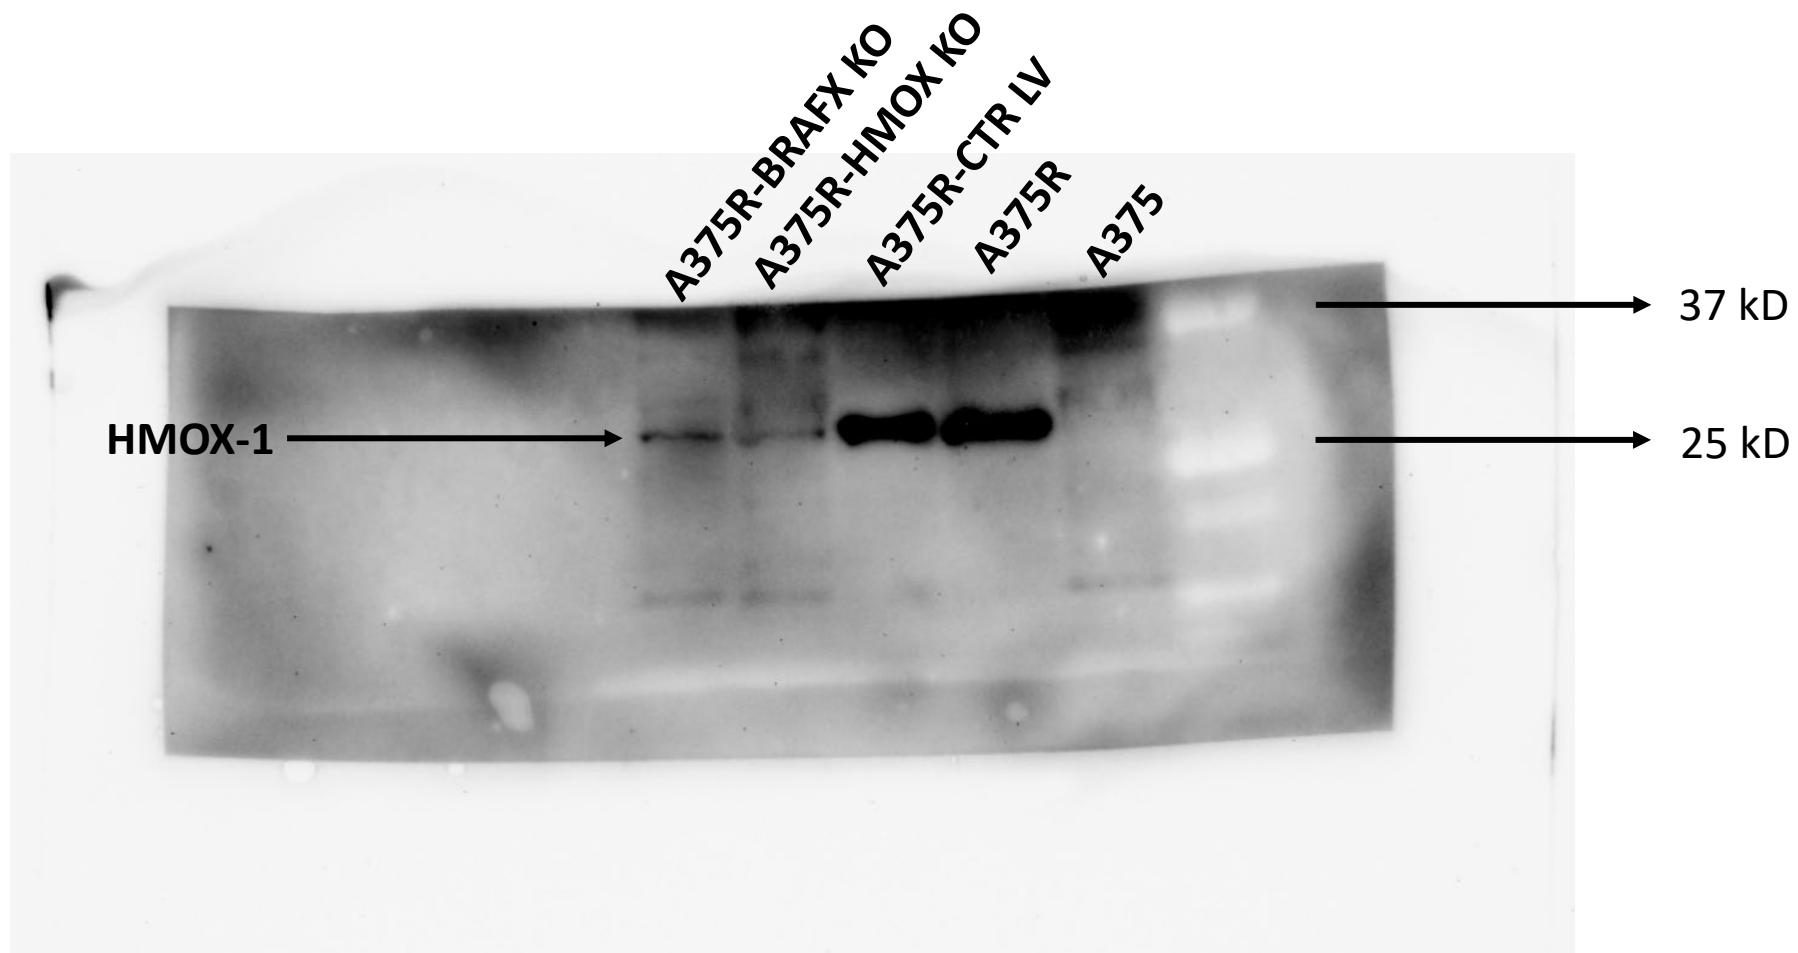

A375R Cells

Original blots for Fig. 4A

# BRAF KO in A375R cells

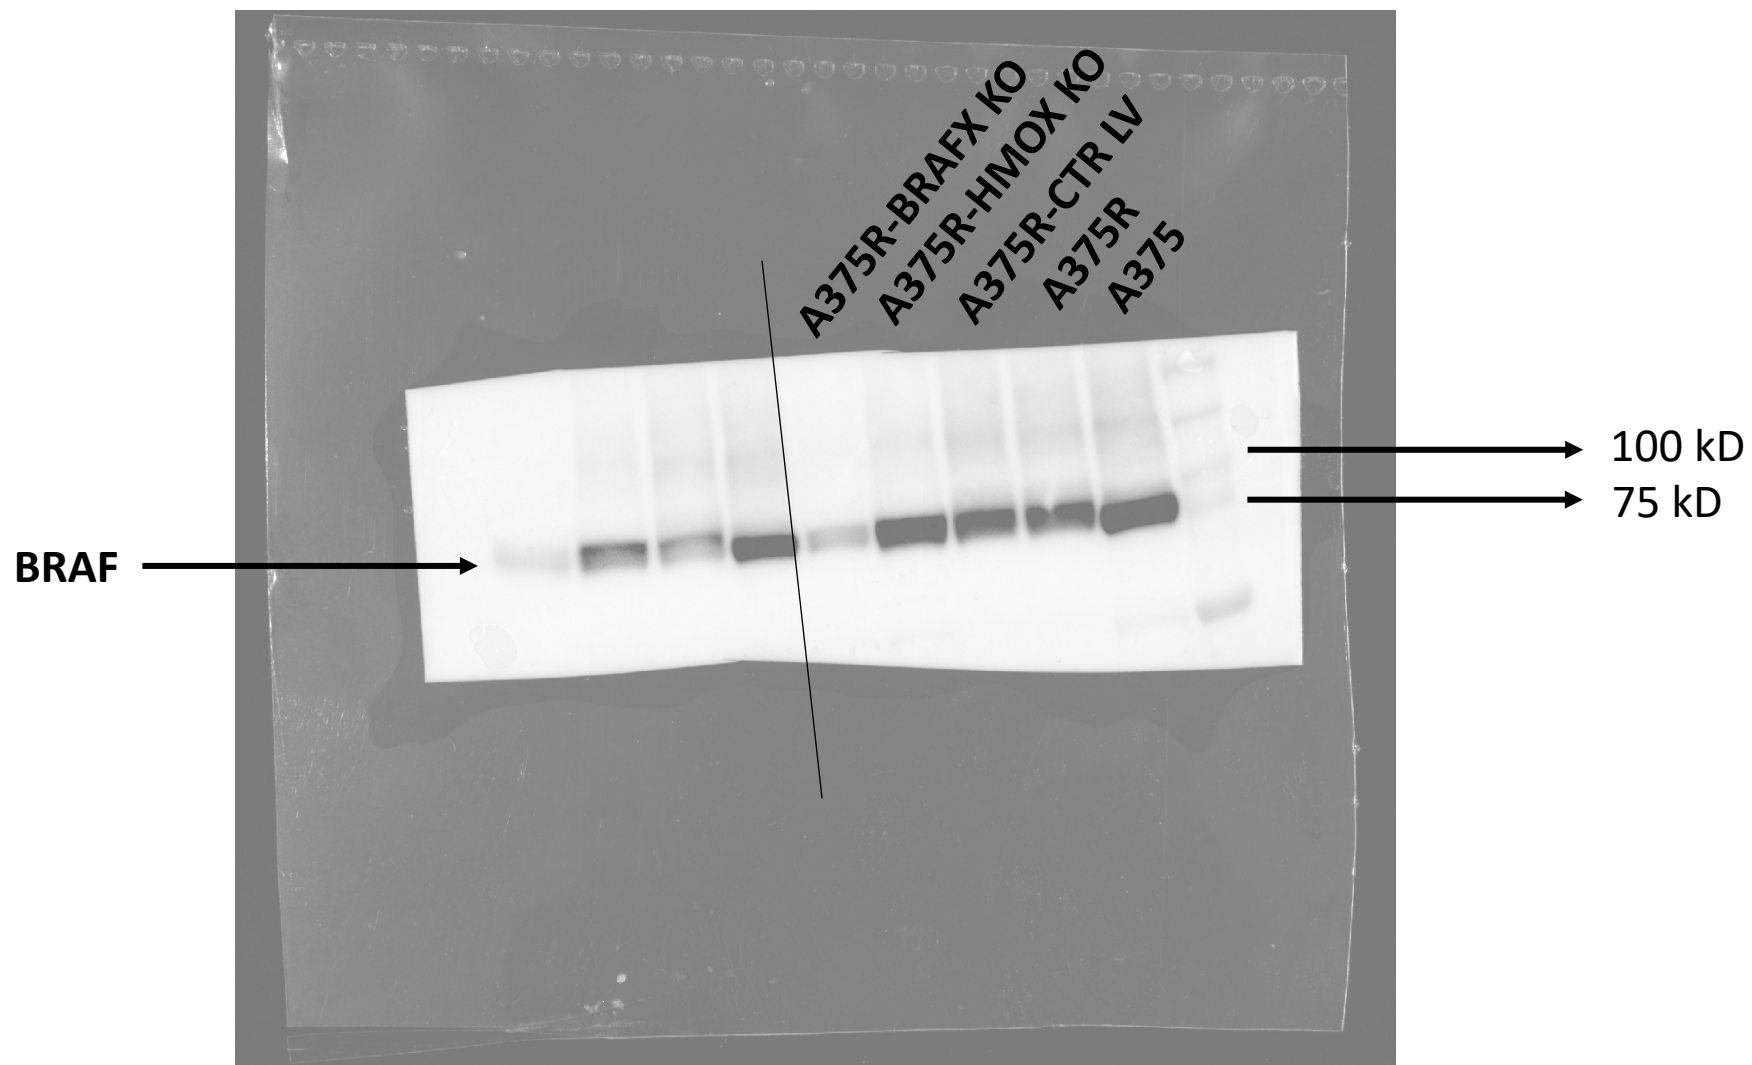

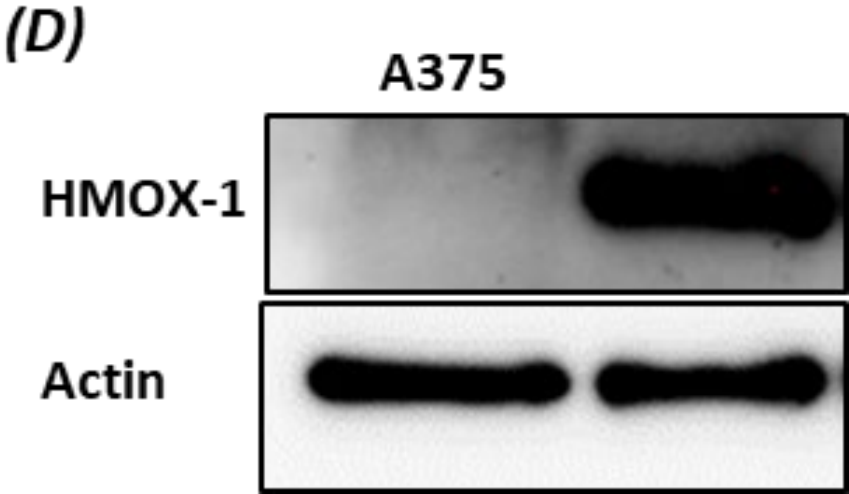

|                  |  |       |  |   |     |  |
|------------------|--|-------|--|---|-----|--|
|                  |  |       |  |   |     |  |
| Compared to A375 |  | HMOX1 |  | 1 | 8.3 |  |
|                  |  |       |  |   |     |  |

(D)

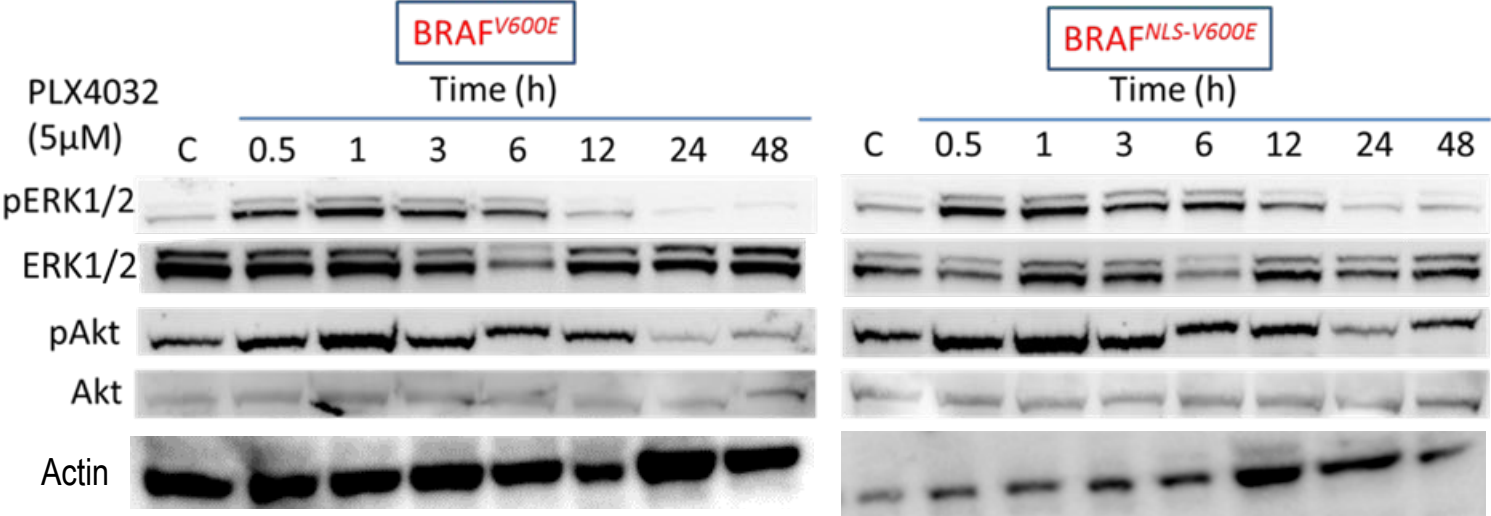

|         | BRAFFV600E) |      |      |      |      |      |      |      | BRAFF(NLSV600E) |     |     |     |     |     |      |      |
|---------|-------------|------|------|------|------|------|------|------|-----------------|-----|-----|-----|-----|-----|------|------|
|         | C           | 0.5  | 1    | 3    | 6    | 12   | 24   | 48   | C               | 0.5 | 1   | 3   | 6   | 12  | 24   | 48   |
| pERK1/2 | 1           | 5.11 | 6.43 | 5.22 | 3.09 | 1.23 | 0.32 | 0.21 | 1               | 6.4 | 6.6 | 3.3 | 5.1 | 2   | 0.53 | 0.83 |
| pAKT    | 1           | 2.2  | 4.3  | 2    | 1.8  | 1.9  | 0.12 | 0.23 | 1               | 3.4 | 5.3 | 3.4 | 2.1 | 2.6 | 0.33 | 1.13 |
| Actin   | 1           | 1.2  | 1.1  | 1.4  | 0.9  | 0.7  | 1.9  | 0.9  | 1               | 1.2 | 1.1 | 1.4 | 1.3 | 2.1 | 1.6  | 0.9  |





Original blots for Fig. *Supplemental Data 5*

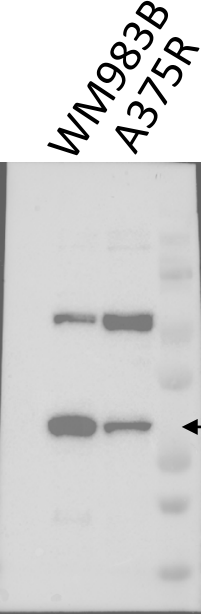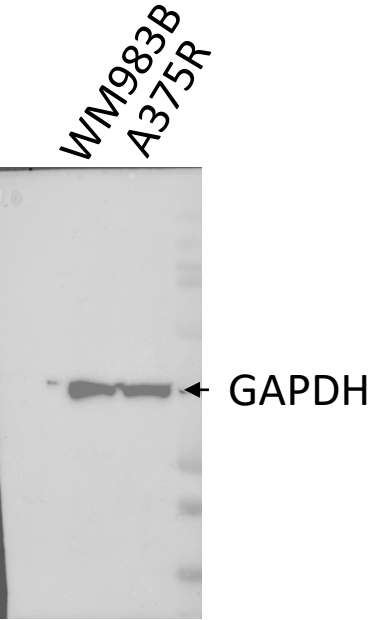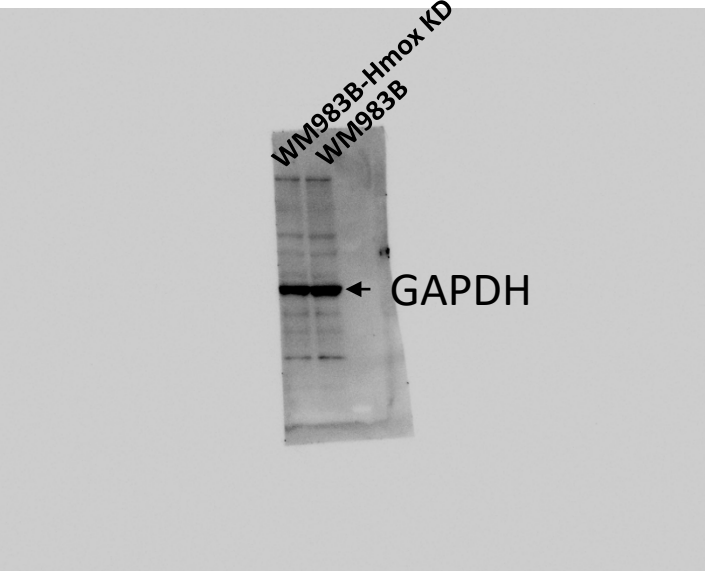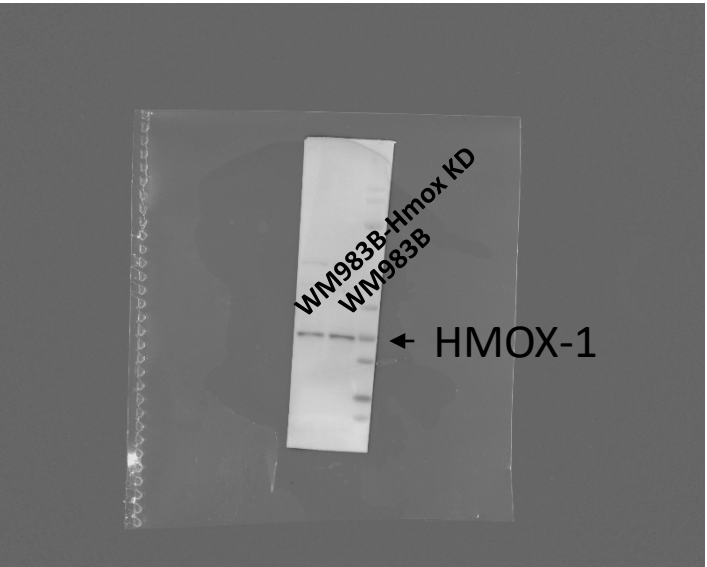

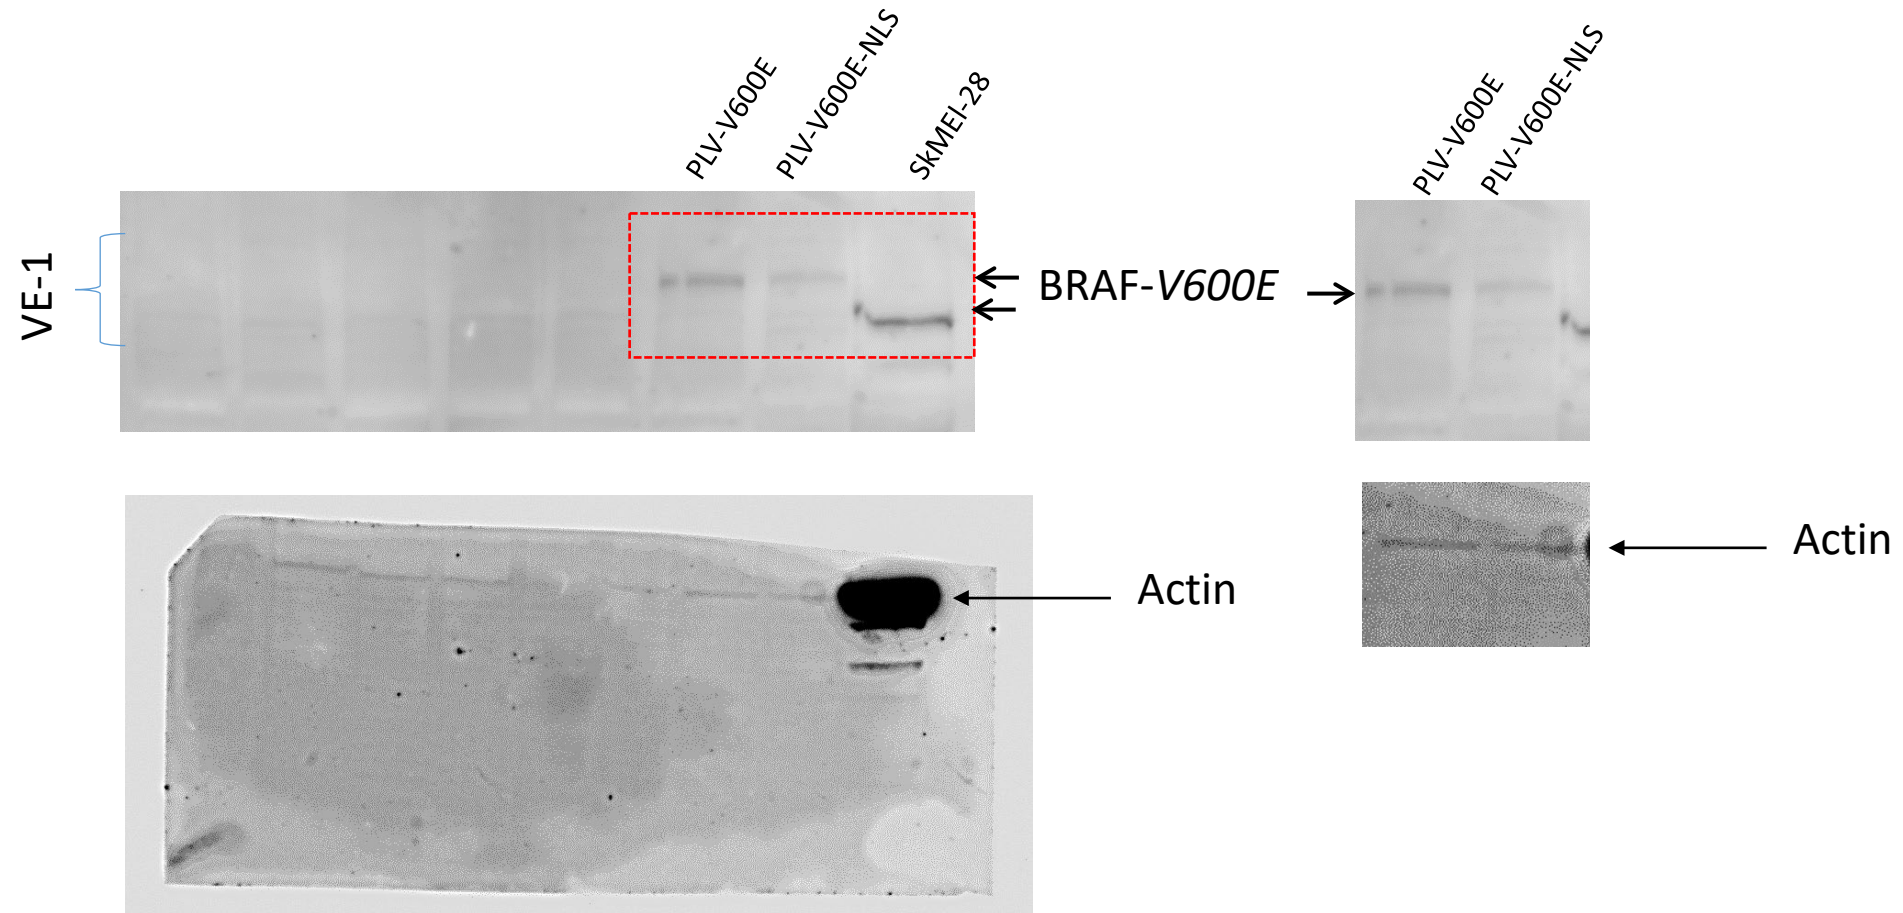

BRAF

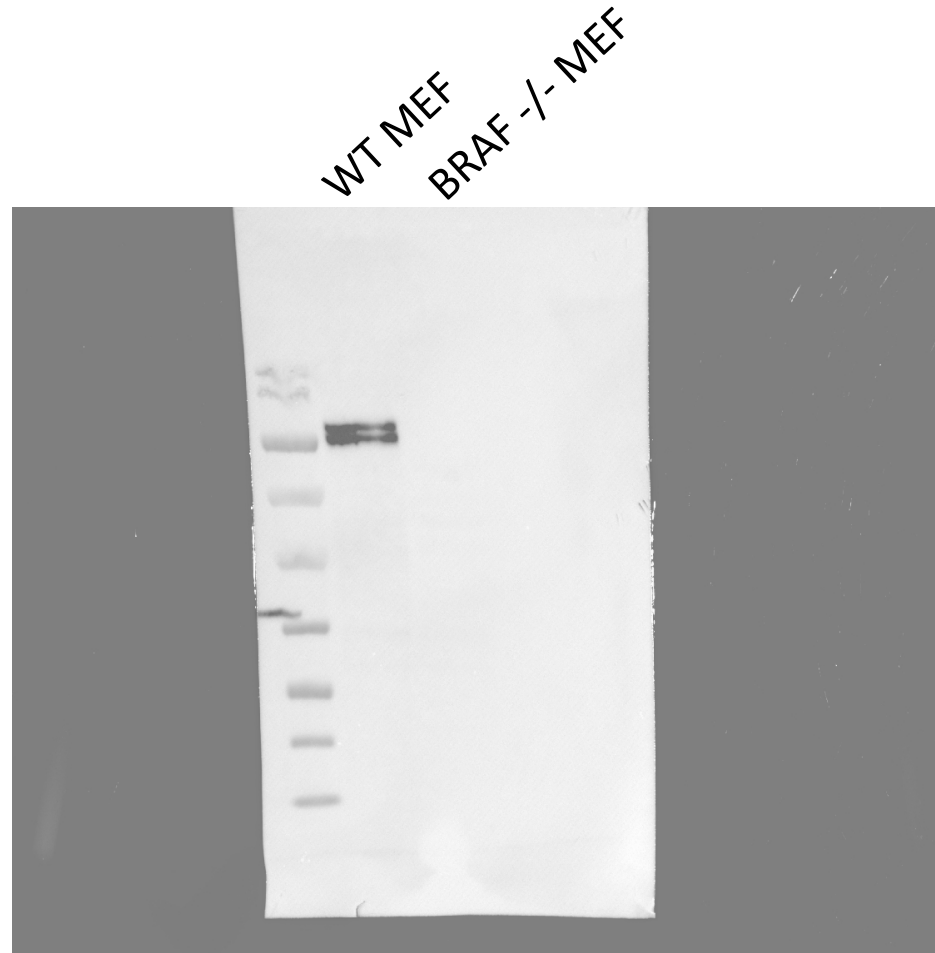

Actin

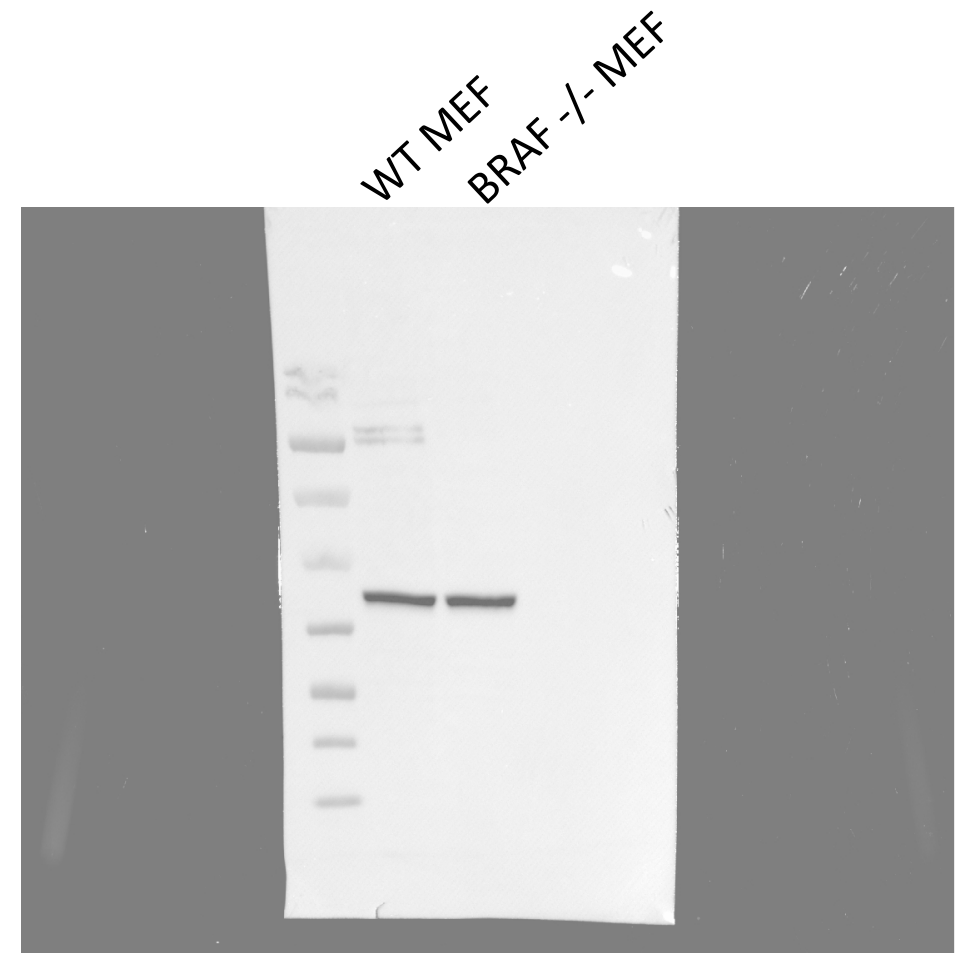

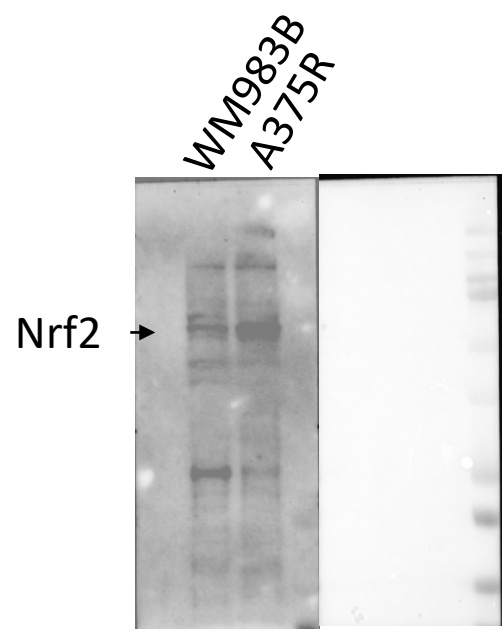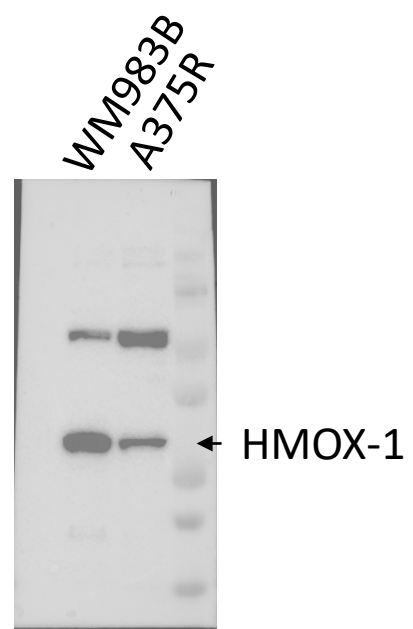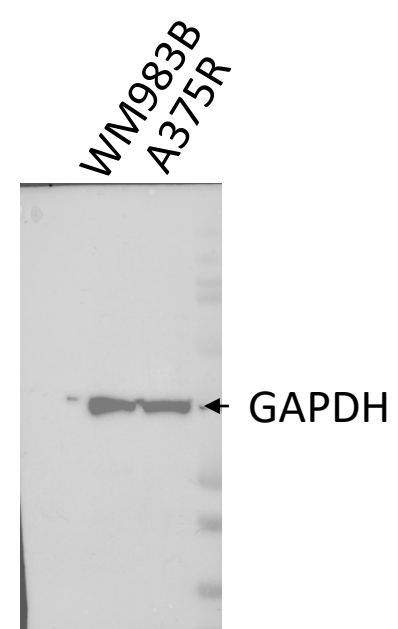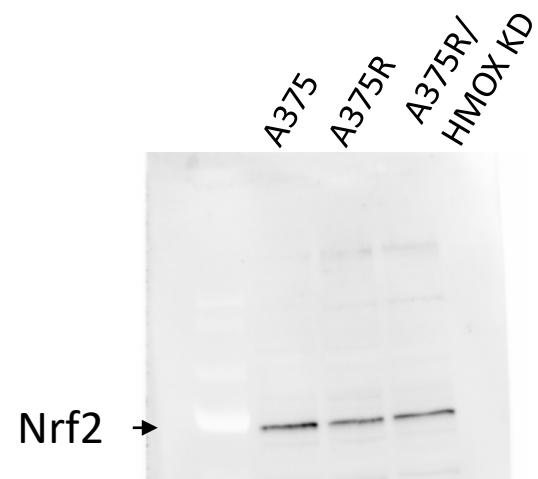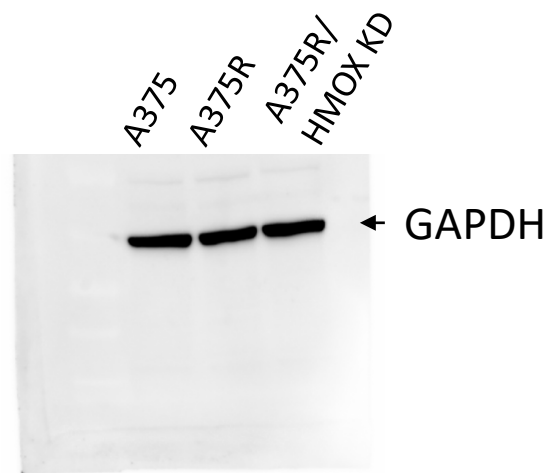

Supplement: s1 [file s1]
