# Supplementary material for: Nuclear Localization of BRAFV600E Is Associated with HMOX-1 Upregulation and Aggressive Behavior of Melanoma Cells
Source: MDPI journal article supplement (doi:10.3390/cancers14020311), 2022-01-09
Supplement: s1 [file s1]

## Supplementary materials

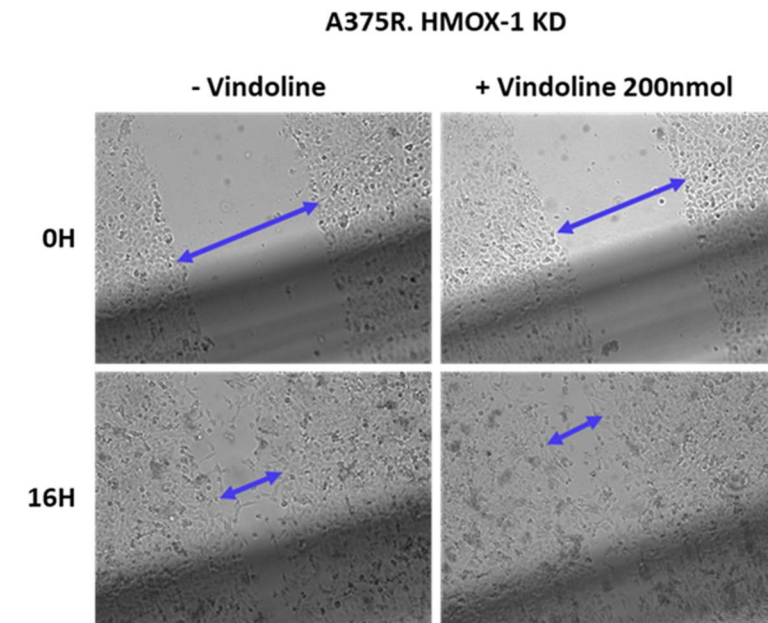

**Figure S1.** Cell migration was evaluated by using wound healing assay in presence or absence of an anti-mitotic agent. No difference was observed before and after Vindoline treatment. No contribution of cell division to the increase of the cell population in the denuded space.

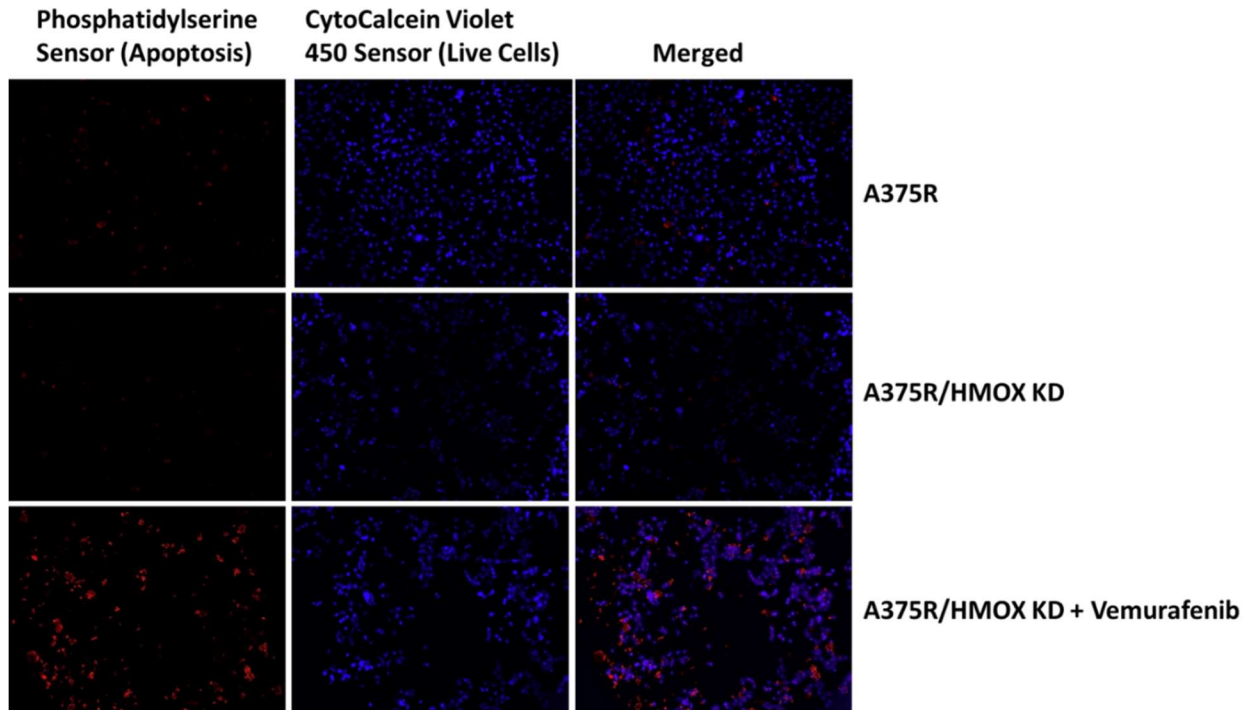

**Figure S2.** Measurement of apoptosis in A375R and A375R/HMOX-1 KD cell exposed to vemurafenib treatment. HMOX knock down (KD) does not initiate apoptosis before vemurafenib treatment.

|                               |               | HMOX-1       | BRAFV600E    |
|-------------------------------|---------------|--------------|--------------|
| Primary malignant melanoma    | #Cores        | 15           | 15           |
|                               | Cytosolic (%) | 13<br>(86.7) | 14<br>(93.3) |
|                               | Nuclear (%)   | 3<br>(20)    | 5<br>(33.3)  |
| Metastatic malignant melanoma | #Cores        | 15           | 15           |
|                               | Cytosolic (%) | 13<br>(86.7) | 15<br>(100)  |
|                               | Nuclear (%)   | 6<br>(40)    | 5<br>(33.3)  |

**Figure S3.** Localization of BRAF<sup>V600E</sup> and HMOX-1 in human melanoma cores. Table summarizing the number of samples with cytoplasmic or nuclear BRAF<sup>V600E</sup>/HMOX-1 after IHC analysis.

|                  |                   |                 |
|------------------|-------------------|-----------------|
| AFP              | ErbB4             | MMP-2           |
| Amphiregulin     | FGF basic         | MMP-3           |
| Angiopoietin-1   | FoxC2             | MMP-9           |
| ANGPTL4          | FKHR              | MSP/MST1        |
| ENPP-2/Autotaxin | Galectin-3        | MUC-1           |
| AXL              | GM-CSF            | Nectin-4        |
| BCL-X            | HCG               | Osteopontin     |
| CA125/MUC-16     | HGF R/c-Met       | p27/Kip1        |
| E-Cadherin       | HIF-1alpha        | p53             |
| VE-Cadherin      | HNF-3beta         | PDGF-AA         |
| CAP-G            | HO-1/HMOX1        | CD31/PECAM-1    |
| CA-9             | ICAM-1/CD54       | Progesterone R  |
| Cathepsin B      | CD25/IL-2 R alpha | Progranulin     |
| Cathepsin D      | IL-6              | Prolactin       |
| Cathepsin S      | CXCL8/IL-8        | Prostasin       |
| CEACAM-5         | IL-18 Bpa         | E-Selectin      |
| Decorin          | KLK-3/PSA         | Maspin          |
| DKK-1            | KLK-5             | PAI-1/Serpin E1 |
| DLL-1            | KLK-6             | SNAIL           |
| EGF R/ErbB1      | Leptin (OB)       | SPARC           |
| Endoglin/CD105   | Lumican           | Survivin        |
| Endostatin       | CCL2/MCP-1        | Tenascin-C      |
| Enolase 2        | CCL8/MCP-2        | THBS-1          |
| eNOS             | CCL7/MCP-3        | TIE-2           |
| EpCAM            | M-CSF             | UPA-1           |
| ER-alpha         | Mesothelin        | VCAM-1          |
| ErbB2            | CCL3/MIP-1alpha   | VEGF            |
| ErbB3            | CCL20/MIP-3alpha  | Vimentin        |

**Figure S4.** The full list of the 84 cancer related proteins array.

[https://www.rndsystems.com/products/proteome-profiler-human-xl-oncology-array\\_ary026](https://www.rndsystems.com/products/proteome-profiler-human-xl-oncology-array_ary026)

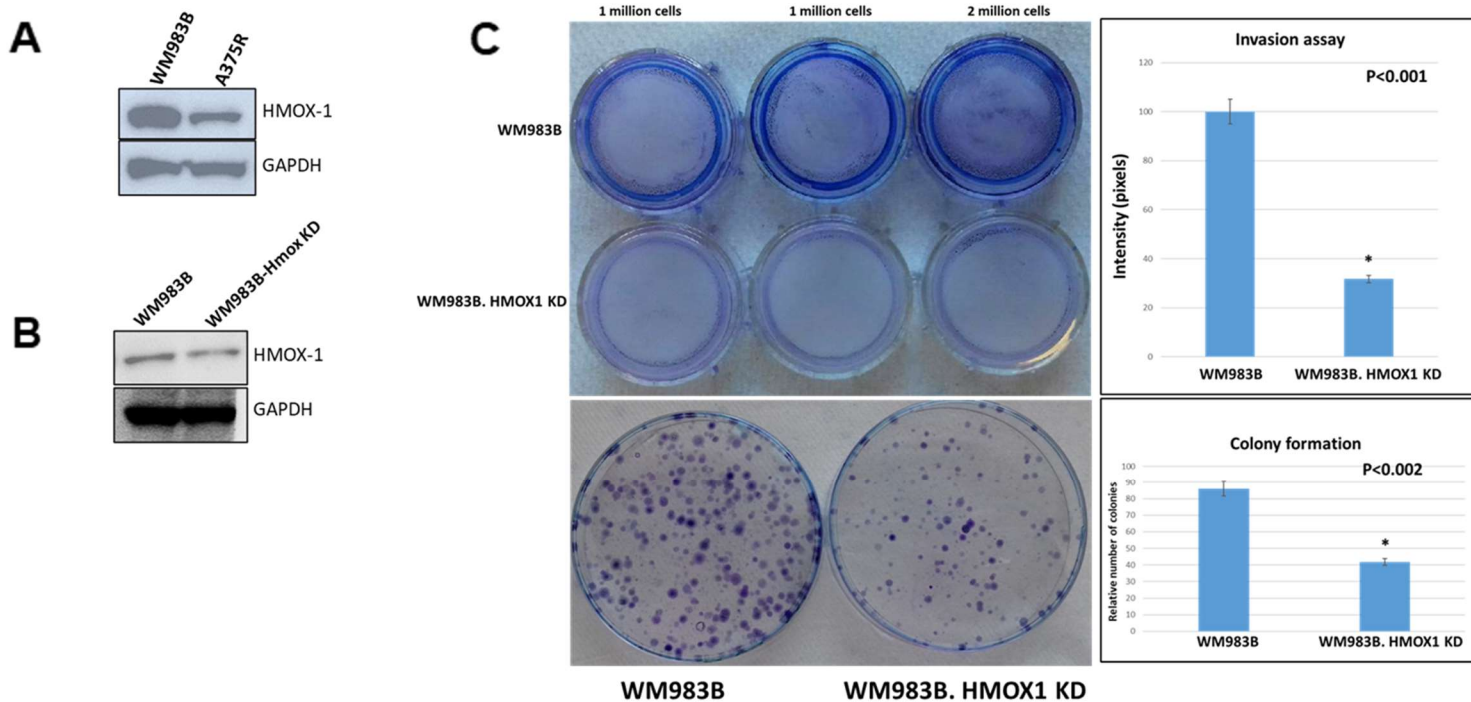

**Figure S5.** Suppression of HMOX-1 has an Anti-Proliferative Effect in WM983B Melanoma Cells. **(A)** HMOX1 expression in two resistant cell lines, A375R and WM983B. **(B)** HMOX1 knock down in WM983B cell line. **(C)** Invasion and colony formation assays before and after HMOX1 knock down in WM983B cells

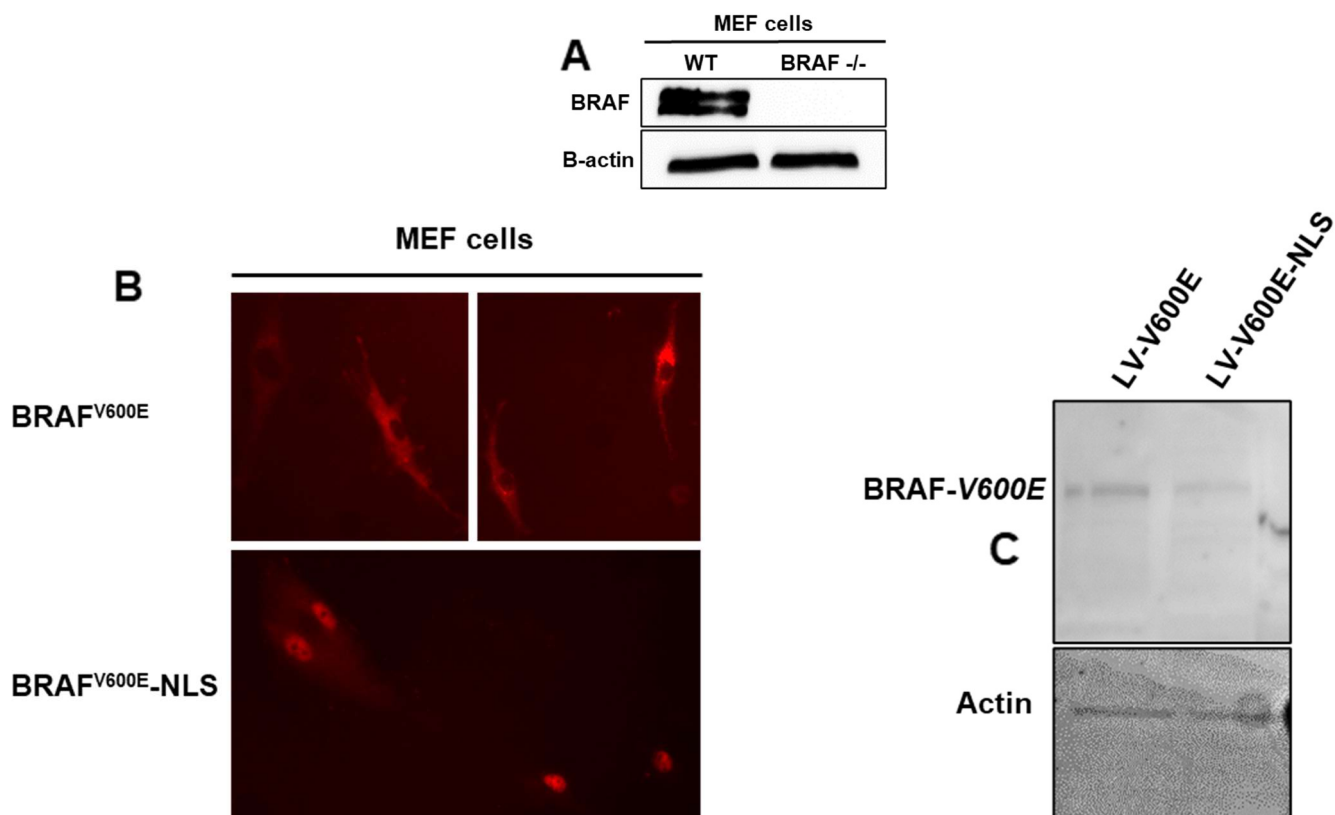

**Figure S6.** BRAF V600E and BRAF V600E -NLS expression in MEF  $-/-$  BRAF cells. **(A)** BRAF expression in WT and BRAF $-/-$  MEF. **(B)** LV-BRAF<sup>V600E</sup> and LV-BRAF<sup>V600E</sup>-NLS expression in MEF BRAF $-/-$  assessed by Immunofluorescence **(C)** LV-BRAF<sup>V600E</sup> and LV-BRAF<sup>V600E</sup>-NLS expression in MEF BRAF $-/-$  assessed by WB.

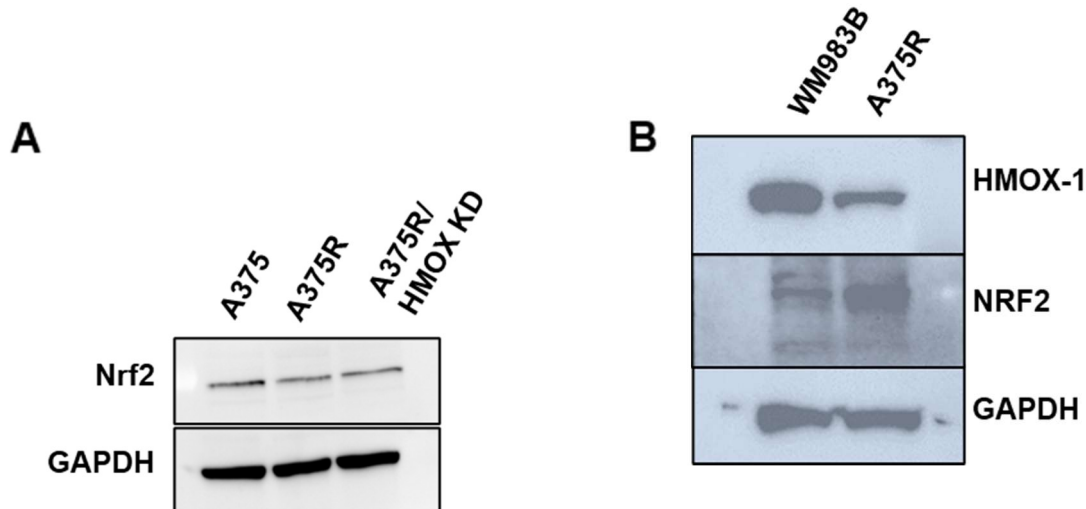

**Figure S7.** NRF2 expression in A375, A375R, A375R/HMOX KD and WM983B cells. **(A)** NRF2 expression in A375, A375R and A375R/HMOX1KD. **(B)** NRF2 expression in A375R and WM983B

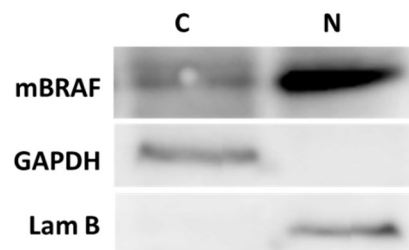

**Figure S8.** Cell fractionations from SkMel-28 cells (C: cytosolic; N: nuclear) were prepared and subjected to western blot analysis using anti-BRAFV600E (VE1 clone), Anti-GAPDH and anti-Lamin B antibodies

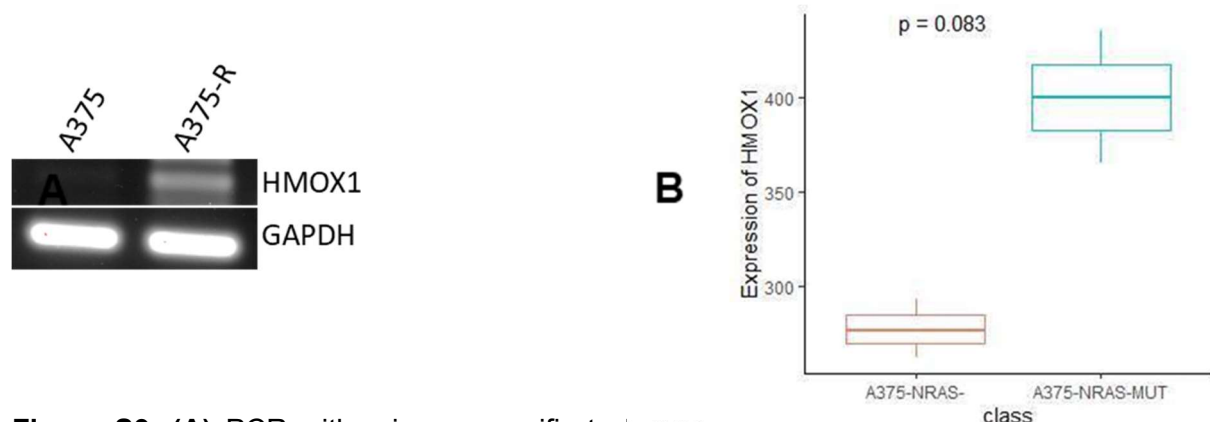

**Figure S9.** **(A)** PCR with primers specific to human. HMOX-1 or GAPDH. **(B)** *In vitro* model of A375 cell line treated with a BRAF inhibitor, HMOX1



was upregulated in the resistant clones, harboring a spontaneous NRAS mutation, compared to the sensitive clones ( $p=0.08$ ). GSE74729 GEO dataset (<https://www.ncbi.nlm.nih.gov/gds>).

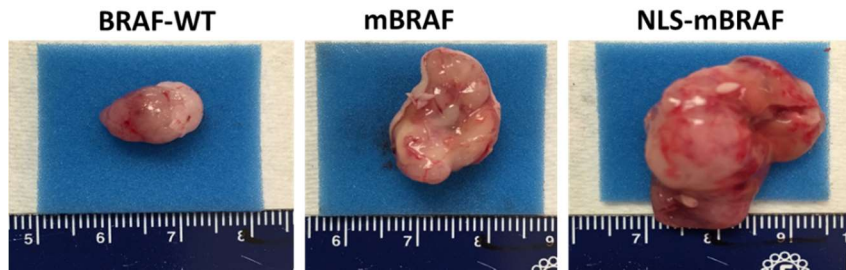

**Figure S10.** Tumors from mice subcutaneously injected with MV3 cells with either nuclear localization signal (NLS)-BRAFFV600E or BRAFFV600E.

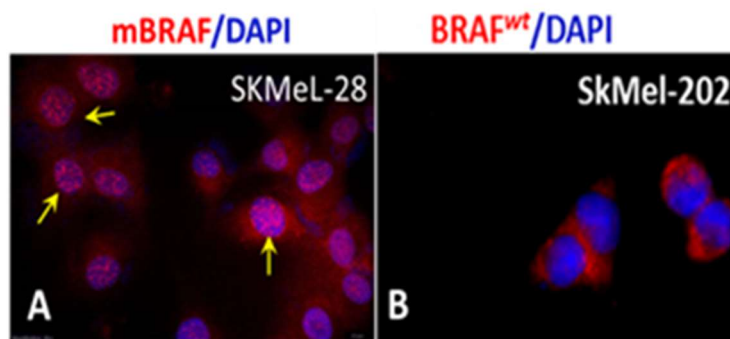

**Figure S11.** Nuclear localization of WT BRAF and BRAF V600E in melanoma cells. SkMel-28 and SkMel-202 Cells were grown in a complete RPMI medium, fixed with 4% formalin and stained with VE1 (SkMel-28) or Pan-BRAF (SkMel-202) antibodies and visualized by fluorescence Microscopy. Arrows indicate the nuclear localization of BRAF V600E; Mag: 400X.
